# Supplementary material
Source: PubMed Central journal article supplement (PMC5981169)

## 1 **Patients and methods**

### 2 *Protocol treatment and definitions*

3 The treatment comprised four main components: (i) induction; (ii) consolidation (SR/IR) or HR block  
4 therapy; (iii) delayed intensifications (DIs); and (iv) maintenance therapy. Induction treatment  
5 included prednisolone on Days 1–29 (BCP-ALL and white blood cell count (WBC)  $<100 \times 10^9/L$ ) or  
6 dexamethasone on Days 1–21 (T-ALL and/or WBC  $\geq 100 \times 10^9/L$ ). Consolidation treatment in the  
7 SR/IR group included intramuscular injections of PegASP ( $1000 \text{ IU}/\text{m}^2$ ) every two weeks from Day  
8 30 (total of five doses) after which adult patients received PegASP injections every two weeks until  
9 Week 33; children were randomized to receive PegASP, administered either at two-week (control  
10 arm, 10 additional doses) versus six-week intervals (experimental arm, three additional doses) from  
11 treatment Weeks 14 to 33 (ie during DI and early maintenance-1). This randomization was closed  
12 March 01, 2016, after which all children received PegASP at six-week intervals from Week 14.<sup>1</sup>  
13 Quantification of PegASP activity measurement was performed in a subset of patients, for whom  
14 sampling took place within 16 days from PegASP administration.<sup>2</sup> SR/IR patients received oral  
15 dexamethasone  $10 \text{ mg}/\text{m}^2$  daily for two weeks during one (SR) and two (IR) DIs. The HR block  
16 therapy included one PegASP injection ( $1000 \text{ IU}/\text{m}^2$ ) at the end of each HR chemotherapy block (in  
17 total nine blocks, or seven if MRD  $<0.1\%$  after the first HR block) and an additional dose of PegASP  
18 at Weeks 99 and 101 during DI. HR patients received oral dexamethasone  $20 \text{ mg}/\text{m}^2$  daily for five  
19 days in three of the HR blocks in addition to dexamethasone  $10 \text{ mg}/\text{m}^2$  daily for two weeks during  
20 DI. Maintenance treatment included dexamethasone  $6 \text{ mg}/\text{m}^2$  daily for five days at eight-week  
21 intervals during Weeks 25–57 (SR) or Weeks 27–51 (IR). Total duration of chemotherapy was 2.5  
22 years for all non-transplanted patients.

23 The presence of a mediastinal mass at diagnosis was defined as a mediastinum  $\geq$  one-third of the  
24 diameter of the thorax at the level of the fifth thoracic vertebra; however, its presence was not a  
25 treatment stratifying factor in the ALL2008 protocol. Central nervous system (CNS) involvement at  
26 ALL diagnosis was defined as CNS1 (no blasts on cytopsin and no other signs of CNS-leukemia),  
27 CNS2 ( $>0$  and  $<5$  cells/ $\mu\text{L}$  cerebrospinal fluid (CSF) with blasts on cytopsin and no other signs of  
28 CNS-leukemia), and CNS3 ( $\geq 5$  cells/ $\mu\text{L}$  CSF with blasts on cytopsin, cranial nerve palsy,  
29 intracranial “leukemic” mass on magnetic resonance imaging (MRI), eye involvement confirmed by  
30 MRI, or a biopsy to reflect ALL). ALL relapse was defined as  $\geq 5\%$  leukemic blasts in the bone  
31 marrow,  $\geq 5 \times 10^6/\text{L}$  cells CSF with leukemic blasts on cytopsin, bulky CNS leukemia on  
32 MRI/computed tomography (CT) and confirmed histologically, or other morphologically confirmed  
33 presence of leukemia at any site. Second malignant neoplasm (SMN) was defined as the occurrence  
34 of a new malignant neoplasm.

35

## 36 **References**

- 37 1. Albertsen BK, Abrahamsson J, Lund B, et al. Intermittent vs continuous asparaginase to reduce  
38 asparaginase-associated toxicities: A NOPHO ALL2008 randomized study [abstract]. *Blood*.  
39 2017;Abstract 1275.
- 40 2. Tram Henriksen L, Gottschalk Hojfeldt S, Schmiegelow K, et al. Prolonged first-line PEG-  
41 asparaginase treatment in pediatric acute lymphoblastic leukemia in the NOPHO ALL2008 protocol-  
42 Pharmacokinetics and antibody formation. *Pediatric blood & cancer*. 2017;64(12).

43

44

45

46

47

48

**Table S1. Multiple analyses of TE subtypes (N=1750)**

|                               |                 | TE-specific HRa | 95% CI    | P      |
|-------------------------------|-----------------|-----------------|-----------|--------|
| <b>PE</b>                     |                 |                 |           |        |
| <b>Mediastinal mass</b>       | No              | 1.00 [ref.]     |           |        |
|                               | Yes             | 1.6             | 0.5–4.9   | .4     |
| <b>Age groups</b>             | 1.0–9.9 years   | 1.00 [ref.]     |           |        |
|                               | 10.0–17.9 years | 2.4             | 0.6–10.0  | .2     |
|                               | 18.0–45.9 years | 11.6            | 4.0–33.7  | <.0001 |
| <b>Sex</b>                    | Female          | 1.00 [ref.]     |           |        |
|                               | Male            | 1.9             | 0.7–5.4   | .2     |
| <b>CSV T</b>                  |                 |                 |           |        |
| <b>Mediastinal mass</b>       | No              | 1.00 [ref.]     |           |        |
|                               | Yes             | 1.1             | 0.3–3.8   | .8     |
| <b>Age groups</b>             | 1.0–9.9 years   | 1.00 [ref.]     |           |        |
|                               | 10.0–17.9 years | 3.3             | 1.5–7.3   | .003   |
|                               | 18.0–45.9 years | 1.9             | 0.7–5.2   | .2     |
| <b>Sex</b>                    | Female          | 1.00 [ref.]     |           |        |
|                               | Male            | 0.9             | 0.4–1.8   | .7     |
| <b>Supra-diaphragmatic TE</b> |                 |                 |           |        |
| <b>Mediastinal mass</b>       | No              | 1.00 [ref.]     |           |        |
|                               | Yes             | 2.2             | 1.0–4.8   | .05    |
| <b>Age groups</b>             | 1.0–9.9 years   | 1.00 [ref.]     |           |        |
|                               | 10.0–17.9 years | 2.8             | 1.3–6.0   | .006   |
|                               | 18.0–45.9 years | 3.8             | 1.8–7.9   | .0004  |
| <b>Sex</b>                    | Female          | 1.00 [ref.]     |           |        |
|                               | Male            | 0.9             | 0.5–1.7   | .8     |
| <b>Infra-diaphragmatic TE</b> |                 |                 |           |        |
| <b>Mediastinal mass</b>       | No              | 1.00 [ref.]     |           |        |
|                               | Yes             | 1.9             | 0.7–5.1   | .2     |
| <b>Age groups</b>             | 1.0–9.9 years   | 1.00 [ref.]     |           |        |
|                               | 10.0–17.9 years | 10.1            | 3.59–28.6 | <.0001 |
|                               | 18.0–45.9 years | 6.5             | 2.0–20.9  | .002   |
| <b>Sex</b>                    | Female          | 1.00 [ref.]     |           |        |
|                               | Male            | 1.4             | 0.6–3.3   | .4     |
| <b>TE at multiple sites</b>   |                 |                 |           |        |
| <b>Mediastinal mass</b>       | No              | 1.00 [ref.]     |           |        |
|                               | Yes             | 2.0             | 0.6–6.2   | .2     |
| <b>Age groups</b>             | 1.0–9.9 years   | 1.00 [ref.]     |           |        |
|                               | 10.0–17.9 years | 8.9             | 2.3–34.6  | .002   |
|                               | 18.0–45.9 years | 10.4            | 2.7–41.2  | .0008  |
| <b>Sex</b>                    | Female          | 1.00 [ref.]     |           |        |
|                               | Male            | 3.0             | 0.9–10.5  | .09    |

49 **Figure S1. The NOPHO ALL2008 Protocol.** Protocol overview for standard risk (SR),  
50 intermediate risk (IR), and high risk (HR) patients with highlighted administrations of  
51 corticosteroids and PegASP.

52

53 **Figure S2. The cumulative incidence of symptomatic TE.** The cumulative incidence of  
54 symptomatic TE by age groups with 95% CIs and patients at risk. The 2.5-year cumulative  
55 incidences were: 3.6% for 1.0–9.9 years (CI, 2.5–4.6); 13.5% for 10.0–17.9 years (CI, 9.5–17.2);  
56 17.0% for 18.0–45.9 years (CI, 12.2–21.5).

57

58 **Figure S3. The predicted cumulative incidence of TE.** The predicted cumulative incidence of TE  
59 by combinations of the TE risk factors from the absolute risk model: age  $\geq 10$  years of age, presence  
60 of mediastinal mass, and enlarged lymph nodes at ALL diagnosis.

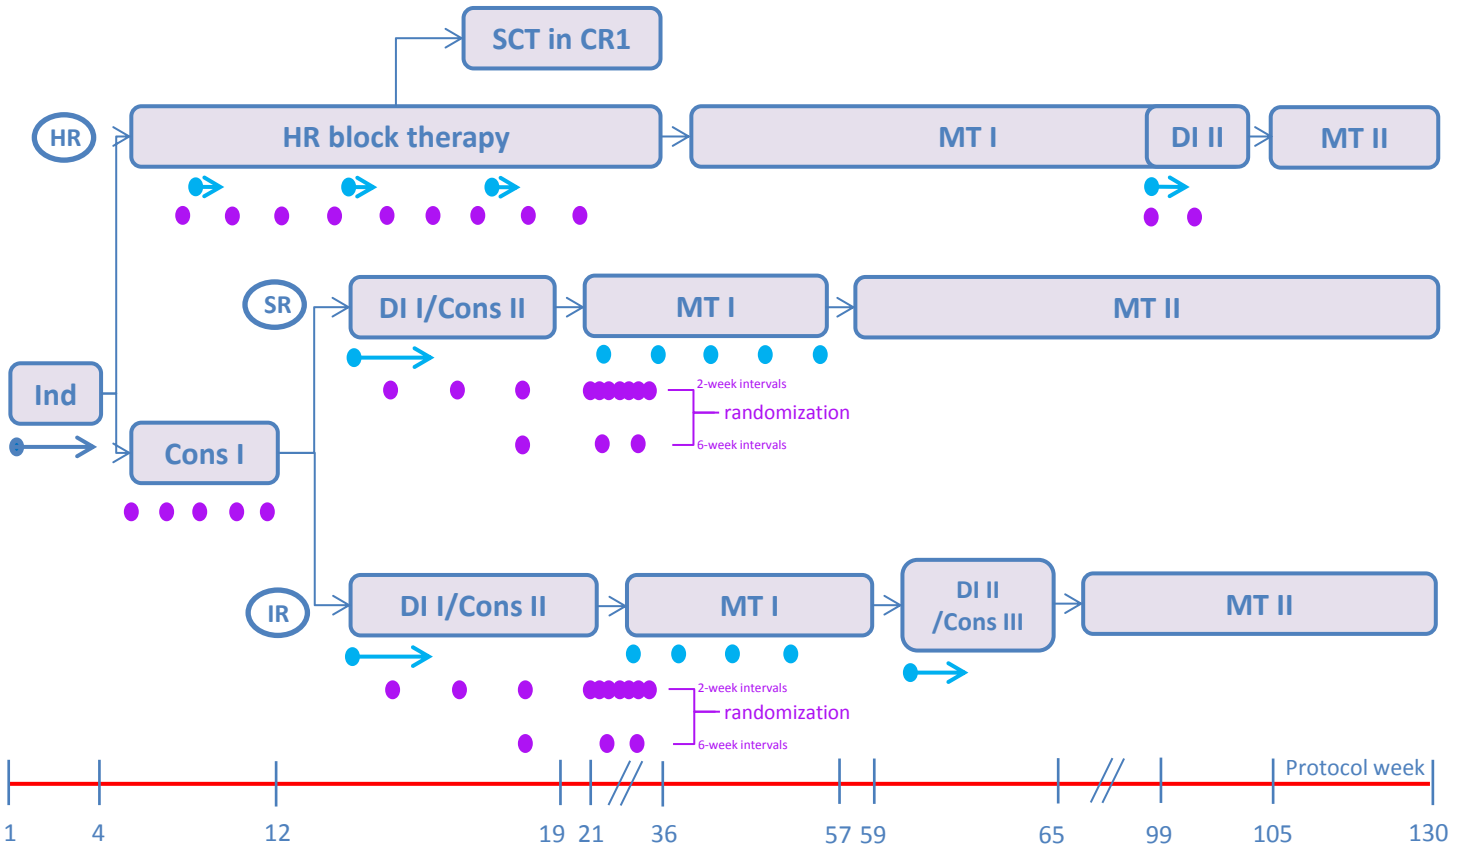

Ind = induction  
 Cons = consolidation  
 DI = delayed intensification  
 MT = maintenance therapy  
 SCT in CR1 = hematopoietic stem cell transplantation in first complete remission

Ind: Dexamethasone 10 mg/m<sup>2</sup>/day for 21 days (WBC ≥100 x 10<sup>9</sup>/L or T-ALL) or Prednisolone 60 mg/m<sup>2</sup>/day for 29 days (WBC <100 x 10<sup>9</sup>/L and BCP-ALL).  
 corticosteroids (2-week blocks, 10 mg/m<sup>2</sup>/day (SR/IR/HR) and 5-day block, 20 mg/m<sup>2</sup>/day (HR block therapy))     asparaginase (1000 IU/m<sup>2</sup>/dosis, i.m.)  
 corticosteroids (5-day pulses, 6 mg/m<sup>2</sup>/day)

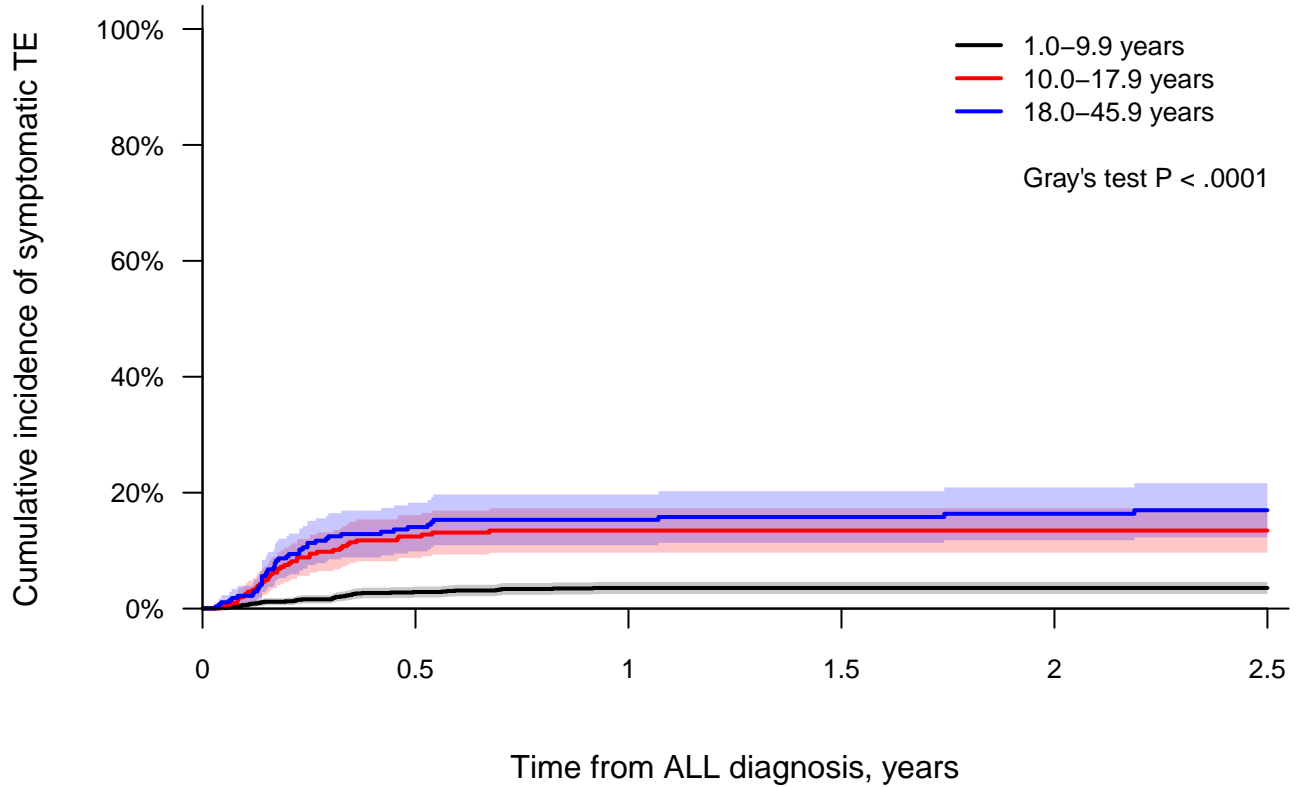

At risk:

|                   |      |      |      |      |      |      |     |     |     |     |     |
|-------------------|------|------|------|------|------|------|-----|-----|-----|-----|-----|
| 1.0–9.9 years :   | 1192 | 1158 | 1111 | 1076 | 1059 | 1026 | 993 | 955 | 915 | 876 | 834 |
| 10.0–17.9 years : | 306  | 272  | 250  | 236  | 225  | 215  | 207 | 200 | 188 | 179 | 172 |
| 18.0–45.9 years : | 274  | 228  | 195  | 168  | 150  | 141  | 133 | 122 | 113 | 108 | 100 |

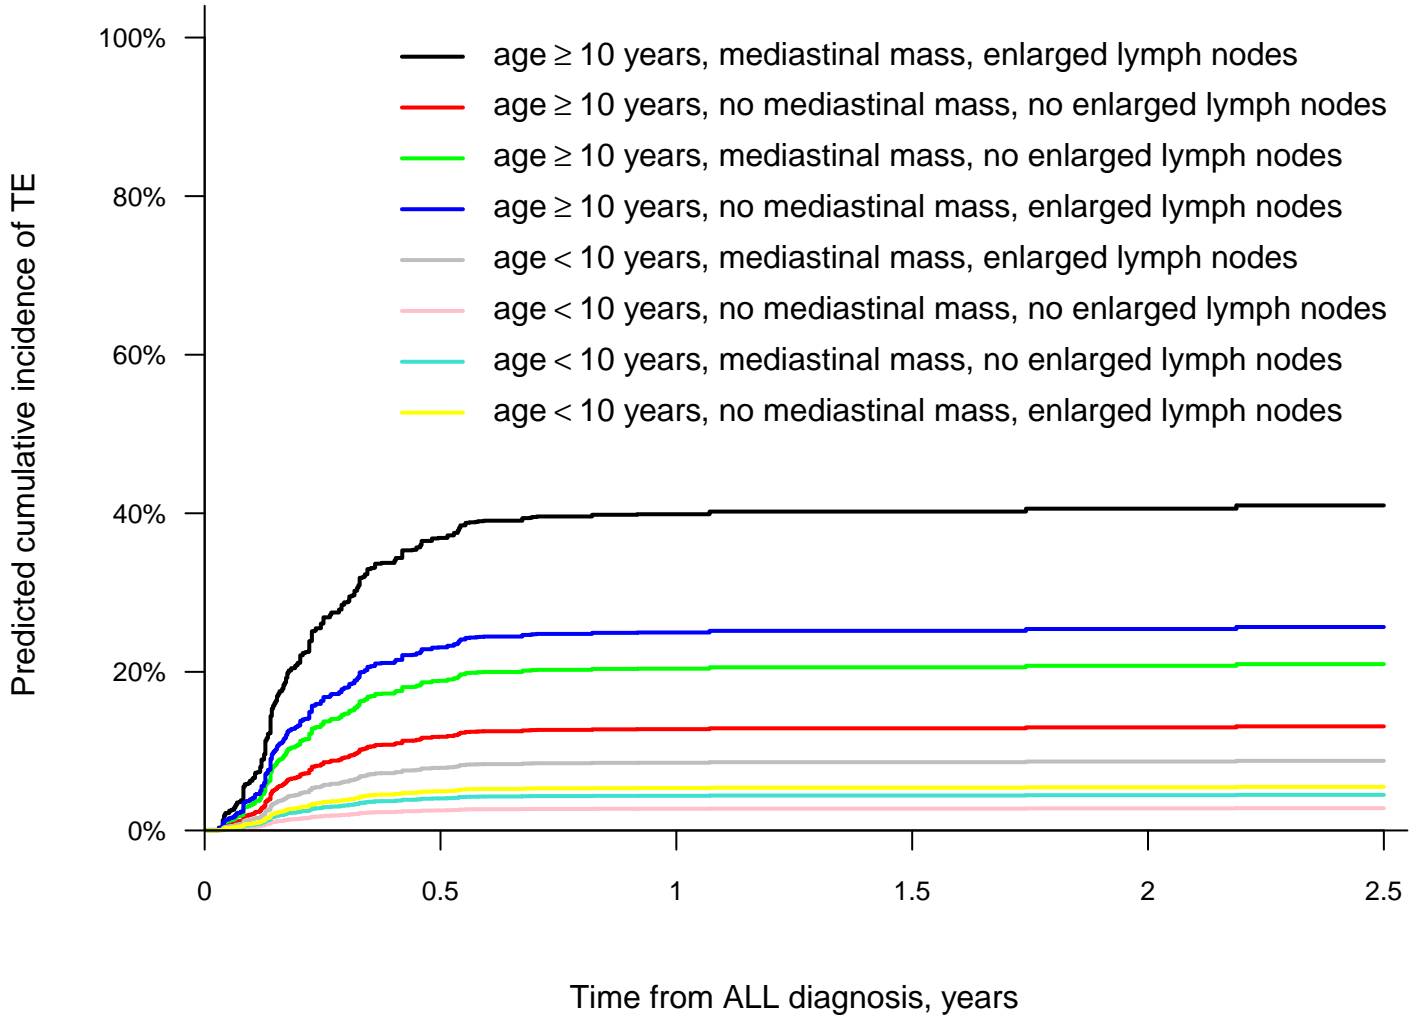

Supplement: blood827949-suppl1.pdf [file blood827949-suppl1.pdf]
